# Supplementary material for: Prevalence and Prognostic Value of Psychological Stress Events in Patients with First Myocardial Infarction—Long-Term Follow-Up Study
Source: MDPI journal article supplement (doi:10.3390/jcm10163562), 2021-08-13
Supplement: s1 [file s1]

Table S1. Association of stressful events before MI with age- and sex-adjusted mean values or concentrations (at the end of rehabilitation) of cardiovascular risk factors and biomarkers.

|                                 | BMI*<br>(kg/m <sup>2</sup> ) | DBP <sup>#</sup><br>(mmHg) | SBP <sup>#</sup><br>(mmHg) | Total cholesterol<br>(mg/dl) | HDL cholesterol<br>(mg/dl) | Triglycerides<br>(mg/dl) | Cotinine <sup>§</sup><br>(µg/l) | CRP <sup>&amp;</sup> (mg/l) | BNP <sup>+</sup><br>(ng/l) | Hs- troponin<br>(ng/l) |
|---------------------------------|------------------------------|----------------------------|----------------------------|------------------------------|----------------------------|--------------------------|---------------------------------|-----------------------------|----------------------------|------------------------|
| Death of family member          |                              |                            |                            |                              |                            |                          |                                 |                             |                            |                        |
| Yes                             | 27.77                        | 73.40                      | 120.18                     | 174.87                       | 40.86                      | 149.82                   | 92.76                           | 4.96                        | 969.43                     | 12.68                  |
| No                              | 27.09                        | 72.24                      | 115.96                     | 171.85                       | 42.19                      | 151.57                   | 91.75                           | 5.10                        | 1004.22                    | 16.62                  |
| p-value                         | 0.14                         | 0.36                       | 0.040                      | 0.52                         | 0.38                       | 0.87                     | 0.96                            | 0.93                        | 0.92                       | 0.34                   |
| Death of friend                 |                              |                            |                            |                              |                            |                          |                                 |                             |                            |                        |
| Yes                             | 27.47                        | 68.39                      | 110.42                     | 168.09                       | 40.66                      | 167.28                   | 81.93                           | 3.91                        | 1454.36                    | 17.83                  |
| No                              | 27.15                        | 72.57                      | 116.73                     | 172.40                       | 42.08                      | 150.41                   | 92.34                           | 5.05                        | 981.01                     | 16.12                  |
| p-value                         | 0.61                         | 0.019                      | 0.028                      | 0.51                         | 0.51                       | 0.25                     | 0.71                            | 0.58                        | 0.30                       | 0.77                   |
| Personal disease                |                              |                            |                            |                              |                            |                          |                                 |                             |                            |                        |
| Yes                             | 26.69                        | 72.61                      | 115.84                     | 172.23                       | 43.14                      | 135.03                   | 77.26                           | 3.88                        | 1128.94                    | 15.15                  |
| No                              | 27.27                        | 72.28                      | 116.50                     | 172.22                       | 41.80                      | 154.03                   | 94.90                           | 5.34                        | 973.80                     | 16.41                  |
| p-value                         | 0.15                         | 0.77                       | 0.71                       | 1.00                         | 0.32                       | 0.038                    | 0.31                            | 0.28                        | 0.59                       | 0.73                   |
| Unusual stress at work          |                              |                            |                            |                              |                            |                          |                                 |                             |                            |                        |
| Yes                             | 26.89                        | 71.66                      | 115.50                     | 173.89                       | 41.45                      | 148.70                   | 98.27                           | 4.76                        | 685.35                     | 12.25                  |
| No                              | 27.32                        | 72.80                      | 116.90                     | 171.13                       | 42.44                      | 152.08                   | 88.97                           | 5.20                        | 1155.04                    | 17.92                  |
| p-value                         | 0.18                         | 0.21                       | 0.34                       | 0.41                         | 0.36                       | 0.65                     | 0.52                            | 0.68                        | 0.042                      | 0.049                  |
| Mental excitement/ dispute      |                              |                            |                            |                              |                            |                          |                                 |                             |                            |                        |
| Yes                             | 27.54                        | 71.28                      | 116.87                     | 168.66                       | 39.70                      | 151.45                   | 94.25                           | 3.80                        | 688.41                     | 12.95                  |
| No                              | 27.08                        | 72.49                      | 116.28                     | 172.53                       | 42.52                      | 149.69                   | 92.31                           | 5.40                        | 1078.75                    | 16.98                  |
| p-value                         | 0.25                         | 0.26                       | 0.74                       | 0.33                         | 0.030                      | 0.85                     | 0.91                            | 0.22                        | 0.16                       | 0.25                   |
| Sleep disorder                  |                              |                            |                            |                              |                            |                          |                                 |                             |                            |                        |
| Yes                             | 27.43                        | 72.11                      | 116.59                     | 172.80                       | 42.16                      | 148.75                   | 91.07                           | 4.66                        | 947.57                     | 15.32                  |
| No                              | 27.10                        | 72.36                      | 116.17                     | 172.80                       | 41.82                      | 151.42                   | 90.56                           | 5.21                        | 1015.76                    | 16.51                  |
| p-value                         | 0.28                         | 0.78                       | 0.77                       | 1.00                         | 0.74                       | 0.71                     | 0.97                            | 0.59                        | 0.77                       | 0.67                   |
| Changes at workplace            |                              |                            |                            |                              |                            |                          |                                 |                             |                            |                        |
| Yes                             | 26.96                        | 70.17                      | 116.18                     | 174.56                       | 41.51                      | 161.30                   | 83.48                           | 4.87                        | 771.62                     | 12.77                  |
| No                              | 27.21                        | 72.77                      | 116.38                     | 172.75                       | 42.05                      | 149.38                   | 92.94                           | 5.14                        | 1041.12                    | 16.81                  |
| p-value                         | 0.65                         | 0.094                      | 0.94                       | 0.75                         | 0.77                       | 0.36                     | 0.70                            | 0.88                        | 0.49                       | 0.42                   |
| Changes in partner relationship |                              |                            |                            |                              |                            |                          |                                 |                             |                            |                        |
| Yes                             | 27.93                        | 70.27                      | 111.49                     | 167.02                       | 42.27                      | 170.35                   | 133.04                          | 5.81                        | 712.15                     | 12.45                  |
| No                              | 27.15                        | 72.47                      | 116.69                     | 172.68                       | 42.03                      | 150.35                   | 89.21                           | 5.08                        | 1020.71                    | 16.44                  |
| p-value                         | 0.32                         | 0.33                       | 0.15                       | 0.48                         | 0.93                       | 0.27                     | 0.19                            | 0.78                        | 0.58                       | 0.58                   |

\*Body mass index

§Cotinine level in serum

<sup>#</sup>Diastolic resting blood pressure

<sup>&</sup>C-reactive protein

<sup>§</sup>Systolic resting blood pressure

<sup>+</sup>NT-pro BNP
